# Supplementary material
Source: Research Square preprint supplement (doi:10.21203/rs.3.rs-9639507/v1)
Supplement: Supplementary file 1 [file 30c79c68d5a131d5fb506696.docx]

**Appendix B: Questionnaires and Interview Guide**

Actual questionnaires for the pastors, leaders and laypersons

a. The LGBTQIA+ inside the church

1. In your observation, what is/are the response(s) of the community and the churches towards the presence of LGBTQIA+?

*Filipino: Sa inyong obserbasyon, ano ang/mga(mga) tugon ng komunidad at ng mga simbahan tungo sa presensya ng LGBTQIA+*

2. In your church, do you have LGBTQIA+ members or none?

*Filipino: Sa inyong simbahan, may miyembro ba kayong LGBTQIA+ o wala?*

3. How do you receive or will receive an LGBTQIA+ in your congregation/ church as a leader or layperson?

*Filipino: Paano ka tumatanggap o tatanggap ng LGBTQIA+ sa iyong kongregasyon/ simbahan bilang leader o layperson?*

b. The participation and involvement of the LGBTQIA+ in the church’s ministries and activities

4. Can an LGBTQIA+ fully participate in the church ministries and activities? Explain?

*Filipino: Maaari bang lubos na makibahagi ang isang LGBTQIA+ sa mga ministeryo at aktibidad ng simbahan? Ipaliwanag?*

5. According to Biblical passages or By-Laws and Rules and Regulations of your church, what makes an LGBTQIA+ unqualified in the church ministries?

*Filipino: Ayon sa Biblia o mga Batas at mga patakaran at regulasyon ng inyong simbahan, ano o anu-ano ang/ mga dahilan kung bakit hindi kwalipikado ang isang LGBTQIA+ sa mga ministeryo ng simbahan?*

6. Whether an LGBTQIA+ is unqualified or qualified, what do you think is/are the ministry(ies) they can do or works they can actively help with?

*Filipino: Kung ang isang LGBTQIA+ ay hindi kwalipikado o kwalipikado, ano sa palagay mo ang / ang mga ministries na maaari nilang gawin o mga maaari nilang aktibong tulungan?*

c. The Future of the LGBTQIA+ in the Pentecostal Church

7. How can you help LGBTQIA+ individuals and communities fully participate in the ministries and encourage them to participate actively in the church?

*Filipino: Paano mo matutulungan ang mga LGBTQIA+ indibidwal at komunidad na lubos na makibahagi sa mga ministeryo at hikayatin silang aktibong makibahagi sa simbahan?*

8. What are your recommendations for the other churches, pastors, leaders, and laypeople to help LGBTQIA+ to actively take part in the church?

*Filipino: Ano po ang mga rekomendasyon ninyo para sa ibang simbahan, pastor, lider, at layko para matulungan ang LGBTQIA+ na aktibong makibahagi sa simbahan?*

Actual survey questionnaires for the LGBTQIA+

a. The LGBTQIA+ or the former inside the church

1. As LGBTQIA+ or the former, what is/are the response/s of the community and church to your presence as LGBTQIA+ now or before?

*Filipino: Bilang LGBTQIA+ o dating LGBTQIA+, ano ang/mga tugon/s ng komunidad at simbahan sa iyong presensya bilang LGBTQIA+ ngayon o noon ikaw ay dating LGBTQIA+?*

2. Are you attending or actively participating in a church?

*Filipino: Dumadalo ka ba o aktibong nakikibahagi sa isang simbahan?*

3. How does the church, like the pastor, leaders, and congregation, receive you as part of LGBTQIA+ or the former individuals and communities participating in the church?

*Filipino: Paano ka tinatanggap ng simbahan, tulad ng pastor, mga pinuno, at kongregasyon, bilang bahagi ng LGBTQIA+ o ng mga dating indibidwal at komunidad na nakikibahagi sa simbahan?*

b. The participation and involvement of the LGBTQIA+ or the former in the church's ministries and activities

4. Can you fully participate in the church ministries and activities? Why?

5. According to Biblical passages or By-Laws and Rules and Regulations of your church, what makes an LGBTQIA+ unqualified or qualified in the church ministries?

Filipino: Ayon sa Biblia o mga Batas at mga patakaran at regulasyon ng inyong simbahan, ano o anu-ano ang/ mga dahilan kung bakit hindi kwalipikado ang isang LGBTQIA+ sa mga ministeryo ng simbahan?

6. Whether you are unqualified or qualified, what do you think is/are the ministry(ies) you can do or works you can actively help with?

Filipino: Kung ikaw ay hindi kwalipikado o kwalipikado, ano sa palagay mo ang / ang mga ministries na maaari mong gawin o mga gawain na maaari mong aktibong tulungan?

*The Future of the LGBTQIA+ or the Former in the church*

7. How can the pastor or church help you with other LGBTQIA+ individuals or the former to fully participate in the ministry like other members?

*Filipino: Paano ka matutulungan ng pastor o simbahan, kasama ang mga ibang LGBTQIA+ individuals o sa dating para lubos na makilahok sa ministry tulad ng ibang members?*

8. What can you recommend to other LGBTQIA+ or the former to fully participate in the ministries and actively help and work in the church?

*Filipino: Ano po ang mairerekomenda n'yo sa ibang LGBTQIA+ o sa mga nauna para lubos na makasali sa mga ministries at aktibong makatulong sa simbahan?*

**Appendix B: Raw Transcription**

How does the Pentecostal Church in (Baguio, La Trinidad, Itogon, Sablan, Tuba) B.L.I.S.T. receive and respond towards LGBTQIA+ participation in the church's ministries?

1. As LGBTQIA+ or the former, what is/are the response/s of the community and Pentecostal Church to your presence as LGBTQIA+?

LGBTQIA+

LG1 (S) Code # 001LG - They were very accepting

LG2 (S) Code # 002LG - I've seen people who I'm not sure are part of the Pentecostal Church Degrade and Wrongly Educate LGBTQIA peeps. Some Try to debate with them in public and Even Inside the church.

LG 3 (S) Code # 003LG - Based on experience for non-believer people they always question your faith and tried to mock you. For the believers they accepted and respect me who am I. They give encouragements in a way not to hurt me, for real talks I’m the kind of person that is open minded. Truth really hurts but need to reflect on this that makes me a better person despite of my gender orientation.

1. As a pastor, what is/are your response towards the presence of LGBTQIA+ in the community and inside the Pentecostal Church?

PASTORS

P1 (S) Code # 001P - Humans are made by God, and have their own gender and we only have two— that’s the male and female— that’s means LGBTQIA+ is not one of them. For us who have known of the truth, all we need to do is to tell them the truth, and also their true gender.

P2 (S) Code # 002P - As a pastor, I have to be more aware that salvation is for all people regardless of their situation— Jesus Christ died for all sinners that is why as a pastor, I have see them as people who are in need of salvation and it gives me more patient and compassion in reaching the LGBTQIA+ instead of creating wall and condemn these people who are struggling in that area of sin.

P3 (S) Code # 003P - My response towards the presence of LGBTQIA+ in the community and inside the church is acceptable because they are souls to win for the Lord Jesus.

P4 (S) Code # 004P - They are all accepted and treated them as normal person because they need also the love of God and need of them to mentoring them in the Christian life to be pleasing in the sight of God and to all people.

P5 (S) Code # 005P - As a pastor we make sure that all will feel welcome in the church.

P6 (S) Code # 006P - No problem. They are humans too. In the church, if they attend, then it is very good indication they have an attraction toward God.

P7 (S) Code # 007P - We can’t deny that in every places there are LGBTQIA+ around as a pastor to local church their presence is not a problem. Let us welcome them and as pastor—just do my role. It is God who will make changes, we are only an instrument of God.

P8 (I) Code # 001P - Sa simbahan namin, since my leader is traditional, they may not condemn them but LGBTQIA+ is a no to them. Noong nasa abroad, I see that the church welcomed these cases, kasi hindi tayo ang magpapabago sa kanila, while we allow them to enter the church— and Salita ng Panginoon ang magpapabago sa kanila. That’s why I believe, as we allow them to enter the church, the word of God will help them change, dahil… the Lord came not for the righteous but for the sinners, at kung hindi nila maririnig ang mga Salita ng Panginoon, then who will change them? I am not saying that I welcomed ‘yung mga ginagawa nilang mali, but I welcome them in the church to be changed. In the community, nakikita na maraming LGBTQIA+ who lack of information and spiritual understanding.

P9 (I) Code # 002P - In the community, i-embrace da ‘ti LGBTQIA+ in general… in the church, there are already biblical conflicts.

P10 (I) Code # 003P - Somehow, there are people who judge them—saying these genders are in negative side. Although some of people accepts them. Especially in the church, as much as possible everyone we must welcome them, but not necessarily you are approving what they are doing.

1. As a leader (or a church member), what is/are your response towards the presence of LGBTQIA+ in the community and Pentecostal Church?

LEADERS/ LAYPEOPLE

LL1 (S) Code # 001LL - These people claiming to be one of this group should be warmly welcomed and the church should be open minded and should set goal in discipling them.

LL2 (S) Code # 002LL - They are part of humanity and so, they can join the church but they have to be changed (a total change should be seen if they receive Christ in their lives) afterwards. And they must be abiding members of the local church adjusting themselves to rules and regulations inside the church.

LL3 (S) Code # 003LL - Okay lang because I'm an open-minded person.

LL4 (I) Code # 001LL - They welcome them, with open arms, without questioning their feelings. They are also welcome in the church—welcomed with love, but still up to them to decide whether to stay or not.

LL5 (I) Code # 002LL - Normal na reaction… is to be shock, and one normal response ay… they will not restrict them to enter the church. Pero, they rebuke them once they entered the church… dahil alam natin, a man must dress like a man and a woman must dress like a woman. Hindi natin sila pinipigilang pumasok sa the church pero, as we respect them, respetohin din dapat nila and simbahan sa pananamit nila ng tama.”

2. As LGBTQIA+ or the former, what is your current status and situation in the Pentecostal congregation/ church?

LGBTQIA+

LG 1 (S) Code # 001LG - Member

LG2 (S) Code # 002LG - I am not against educating the LGBTQIA about the bible, people should do it correctly. I go to my Uncle's church and there I was treated equally not by everyone but I stayed there cause of how my pastor treated me.

LG 3 (S) Code # 003LG - A simple and slightly active member of my church.

2. What is the current status or situation of LGBTQIA+ in your congregation/ church, like do you have attendee(s) or none?

PASTORS

P1 (S) Code # 001P - Still they are welcome and we are willing to teach them. P2 (S) Code # 002P - Our church does not encounter LGBTQIA+ yet.

P3 (S) Code # 003P - The current status or situation of LGBTQIA+ in the church is to show them love of God to them that they would feel that they are welcome, and as they listen to the word of God. I believe that they will respond to the word of God that can change their life.

P4 (S) Code # 004P - As of now, we do not have any LGBT but we are mandated also to reach them and evangelize them at any cost as a response of the mandate of God.

P5 (S) Code # 005P - Our church currently does not have any member of LGBTQIA+ P6 (S) Code # 006P - None yet.

P7 (S) Code # 007P - They just come as attender and observer.

P8 (I) Code # 001P - There are some in the youths, ages 15-16. But, some of the event they attended, many condemned them, but, I still tried to help them understand the standing of others— and I am happy that person is still active in the church. They don’t wear like woman but most of their actions are feminine… hopefully they

will be change little by little.

P9 (I) Code # 002P - It seems like there is/are. Somewhat they wear earrings and acts like a woman.

P10 (I) Code # 003P - Honestly, I see it somehow they have tendency as such but not totally express to the public.

2. What do you see is the current status and situation of LGBTQIA+ in the Pentecostal congregation/ church you belong?

LEADERS/ LAYPEOPLE

LL1 (S) Code # 001LL - I don’t see nor have witness any discrimination

LL2 (S) Code # 002LL - I cannot say they are, because when asking them they claim that they are not. LL3 (S) Code # 003LL - Typical lang. Sa church namin LGBTQIA is very welcome.

LL4 (I) Code # 001LL - There are some in the youths and in our youth camp there are LGBTQIA+. Still, we teach them the word of God. There may be some who act like feminine.

LL5 (I) Code # 002LL - Before there are some but we don’t have now.

3. How does the Pentecostal Church, like the pastor, leaders, and congregation, receive you as part of LGBTQIA+ or the former individuals and communities participating in the church?

LGBTQIA+

LG1 (S) Code # 001LG - They received me quite normally.

LG2 (S) Code # 002LG - My Uncle's a Pastor, I was never treated differently by him. He even Protected me from her wife who was somewhat not accepting of the fact that I am an LGBTQIA+ member who go to their church.

LG3 (S) Code # 003LG - So far no bad experience and rejection, my pastor and congregation always been good and concern to me, they always reminds me to do what is right and good in the eye of God. So I always choose be good always, despite of my sexual orientation I do things pleasing to my creator eyes. To be a son to my parents, to be good brother to my siblings, to be loving uncle to my nephews and nieces, some to lean on to my friends, good health care provider and public servant to everyone, good abiding citizen in our country and more.

3. How do you receive the LGBTQIA+ in your congregation/ church as a Pentecostal Church?

PASTORS

P1 (S) Code # 001P - Still, their souls are important to God, and if God loves them, we also love them and willing to help them overcome …

P2 (S) Code # 002P - Our church is open to every kind of people and our mission is to be a place where they can find help, healing, hope and purpose. Our church will accommodate and welcome them.

P3 (S) Code # 003P - They are much welcome to the church, as Jesus loves sinner.

P4 (S) Code # 004P - Well accepted them as they are, but we need to counsel them regarding the discipline inside the church.

P5 (S) Code # 005P - We make sure to reach them with love in the church— they will feel that they are welcome and love.

P7 (S) Code # 007P - I received them sincerely, since they’re only attender.

P8 (I) Code # 001P - I do not have the right judge them, because of some factors— like how the family raise them and how the environment influenced them, it gives them reason to define their identity… so the church is there to heal that. The part of the church is to let them know the word of God, so that the word of God will be the changing factor to their life. If we insist to them that those are wrong or sins… they will end up moving out from the church. If we condemned them and they will move out them who will tell them the what is right. So, I welcome them in the church, so that they will be mold… little by little… because in the church there will be

healing and transformation.

P9 (I) Code # 002P - If ever no addan to umay ngay LGBTQIA+ idyay church, acceptaran tayo isuda, ta ammo tayo iti pudno nga sasao ti Apo nga maikaskasaba kadakwada, Ipakitan to ti Apo no anya ti pudno nga identity da.

P10 (I) Code # 003P - I am not sure, but if ever there will be, honestly nagrigat nga i-deal lalo iti panag-cater kenkwada. Well, when it comes to relationship, just like to other members—i-welcome tayo isuda, ngem we still have to stick on the word of God, if given the chance, kasao tayo isuda personally and discussed about it.

3. As a leader (or a church member), how do you receive an LGBTQIA+ in the congregation/ church?

LEADERS/ LAYPEOPLE

(S) Code # 001LL - I will accept them warmly in the light of God’s grace and compassion, with the goal of discipling them.

(S) Code # 002LL - I welcome them, but as I have said a while ago, a changed must be seen and a willingness to obey.

(S) Code # 003LL – In our church LGBTQIA+ is very welcome. Not to the point we tolerate their situation however we are allowing them because we do believe that one day they be convicted of their LGBTQIA+.

(I) Code # 004LL - I-welcome tau isuda, and I respect them as a person. I tried to understand their feeling, ngem ammo tau nga iti sasau ni Apo ken ti Gospel, as they listen and learn, I know addan ton panagbalbaliw emotionally. Ammo tau man wen nu haan kasano agtrabaho ti Apo iti biag da, ngem, kas iti testimonies nga nangegak, ada man harsh nga past da ngem God transformed them— awan iti impossible kini God. For me, I embrace them.

(I) Code # 005LL - They are welcome, but we accept or perform in the ministries of the church, because they are not a role model in the church. If they want to become a Christian they have to embrace Christ as Christ embrace them. They not avoid their body language that is feminine, or the way they talk, still they have to avoid dressing like a woman. For me there should be personal submission that will help stablish themselves, it is not the pastor who will demand it but a personal initiative to tell it to before commitment.

4. How do you, as LGBTQIA+ or the former, fully participate in the Pentecostal Church – in the ministries or activities, inside or outside the church?

LGBTQIA+

(S) Code # 001LG - I think generally LGBT members are mostly musically inclined and are culture-bearers / promoters. I for one

love music and my Igorot culture so I participate more in the music ministry, bands, choirs, indigenous dances, gong playing.

(S) Code # 002LG - I was once actively participating in my church's activities, even up to this date if someone invites me to join them for a church activity I still try to go.

(S) Code # 003LG - Most of the activities or ministries in the church I always choose away from the limelight, so I usually join in

the planning, executing and evaluation part.

4. How does an LGBTQIA+ fully participate in the church ministry, for example, as a volunteer or participating in a minor or major role in the ministry?

PASTORS

(S) Code # 001P - The most important things is that if they are willing to transform and accept their true form as children of God, and if they will love God truly and the commandment of the Lord. Everybody has a second chance— we all do.

(S) Code # 002P - We have to deal their situation first before we allow them to get involve in a particular ministry. If they are willing to be humble once acknowledge their weakness we will help them and disciple them and

involve in a particular ministry.

(S) Code # 003P - The participation of LGBTQIA+ in the ministry as volunteer is they must go through the process like training, discipleship before accepting them to participate and volunteer in the ministry.

(S) Code # 004P - As long that they have transformation experienced and willing to work with is in the Kingdom of God. We give them a minor ministry to lead them various leadership such as leading prayer support, inviting someone, and usher rete ministry.

(S) Code # 005P - If in the future we do have members of the 3rd set in our congregation— we won’t involve them in the ministry until we see a transformation in their life.

(S) Code # 006P - Open as long as they are not creating problems in the church.

(S) Code # 007P - Church attender

(I) Code # 008P - The people getting involved in the ministry went through the process mandated by the church. For LGBTQIA+ they may desire to participate, however, there will be certain limitation, like they will not stand in front of the pulpit, and song leading, because some congregation will be disappointed. They may have some special number. I acknowledge that many LGBTQIA+ are talented, gifted and knowledgeable, but I still restrict them to stand in the pulpit, so that some will not be offended because the congregation have different views and perspectives about them. If I allowed them, may be there will be persecution and criticism that will be coming from them. Still, I allow them to some activities, and I choose carefully which part of the activities and works they can participate. Nevertheless, preaching, teaching and praise and worship leading will not be appropriate for them yet. There may be limitation, but I make sure that they are not discriminated in the church.

(I) Code # 009P - I think yes, especially if you can see their eagerness to serve.

(I) Code # 0010P - We acknowledge their skills and talents—actually they are more knowledgeable. Still, it is a no. Coming from a conservative church, we do not choose someone to just to stand in front, they can be a participant, but to handle and lead a ministry is a no.

4. In your observation in your church, how does an LGBTQIA+ fully participate in the church ministry and activities, for example, as a volunteer or participating in a minor or major role in the ministry?

LEADERS/ LAYPEOPLE

(S) Code # 001LL - Our local church haven’t encountered having LGBTQIA+ members, more so involving them in the ministry.

(S) Code # 002LL - I see some in the music ministry and children's ministry.

(S) Code # 003LL - For us sa church, as of now we let them engage in our church activities and ministries in a way na they will be use in a minor role but not in the major role. Kumbaga sa mga simple things peru when it comes sa mga preaching/sharing God's word, leading songs, and leading prayers we don't involve them.

(I) Code # 005LL - We do not allow them to stand in front or to be use in the public, because there are rules in the church that they are restricted to that. However, if they want to help—to support they are welcome.

(I) Code # 006LL - I cleared it out already, they can’t fully participate—they are only participants. Participants, meaning, like in a camping they can participate as campers. For me they cannot perform or lead certain ministries, because they are not a leader themselves—because I know that they are aware that there is something about them that is not good in Christians.

5. What limits you as LGBTQIA+ or the former from fully participating in the Pentecostal Church ministries, like volunteering or participating in a minor or major role in the ministry of the church?

LGBTQIA+

(S) Code # 001LG - There are associations in our church composed of purely men (a brotherhood). They do invite me every now and then to join but being gay somewhat stops me from joining, the men are very accepting and accommodating but some older men still have a very traditional mindset and would ridicule LGBT people. Sometimes even our pastor would make snide remarks when a bible passage relates to the LGBT and the issue of same sex marriage.

(S) Code # 002LG - Churches shouldn't give any limits to people who want to serve the lord. As long as their willing to do so.

(S) Code # 003LG - Definitely on how people react, that’s why I don’t usually join outside church activities unlike in our church I know how people will react and I know when I’m not qualified to participate.

5. What do you think is/are the limitations of the LGBTQIA+ in fully participating in the Pentecostal church ministry–what possible ministries or a minor or major role in the ministry can they participate in?

PASTORS

(S) Code # 001P - With God, all things are possible, they can become one of the anointed ministers, as long as they are willing and accept God as their personal savior and be baptized by the Holy Spirit.

(S) Code # 002P - Most of LGBTQIA+ are gifted in some area of talent, but their unwillingness to be charge will limit them to develop their God given gifts.

(S) Code # 003P - The limitation of the LGBTQIA+ in fully participating in the church either minor is depending on how they respond to training or discipleship, there must be transformation in their lives.

(S) Code # 004P - In the area of full blast ministry, maybe their limitation is their lack of personal awareness of being example in their attire and words.

(S) Code # 005P - They can definitely involve in the ministry but we make sure that they go through a process of discipleship and that there is really a fruit of repentance.

(S) Code # 006P - I do not know yet. As mentioned above, they must undergo training and discipleship.

(S) Code # 007P - Church beautification and could help local pastor in church improvement.

(I) Code # 008P - I still try to expose them in the ministries and word of God, so that the more they are expose they will be change. They are still welcome to all activities and works of the church but making them part of the limelight may be unwise for me as a pastor because of possible criticism from people. However, I make them take part of the tasks and works of certain ministries and activities that I know the people they are with will not discriminate them.

(I) Code # 009P - Ministry is not only playing instruments, but everything that can be done in the church is a ministry—like cleaning. They can be use in every ministry like praise and worship.

(I) Code # 010P - They can help fixing, whenever there are events they can help—fixing the chairs, preparations, cooking, but in praise in worship, leading youth, Sunday school—anything that involve teaching is a no.

5. What do you think is/are the limitations of the LGBTQIA+ in fully participating in the Pentecostal church ministry–what possible ministries or a minor or major role in the ministry can they participate in?

LEADERS/ LAYPEOPLE

(S) Code # 001LL - I believe that in the early stage of transformation, they can only be involved in the menial tasks such as in the physical maintenance of the worship hall and other similar tasks.

(S) Code # 002LL - There should be limitation in joining like a ministry that requires leadership. They can he part of it but they should not be the main lead.

(S) Code # 003LL - I think they are not allowed to be use in preaching God's word while they are still a LGBTQIA, they are not allowed to be use in praise and worship. However, they are allowed to be use in all things except preaching and worship leader. Through my observation in other pentecostal church they are allowing the LGBTQIA to lead praise and worship and preaching God's word because they are not obvious in their speech, actions and clothing even though they are LGBTQIA and of course I don't know if what's their opinion about it.

(I) Code # 004LL - There are different departments in the church, and there are different committees as well. They can help in many ways, like preparation of the place, cleaning, arranging the chairs. In the children department, they can help to control the kids. They can help in cooking, but letting them participate that is visible to many people like singing or standing in front is a no.

(I) Code # 005LL - Likewise

6. As an LGBTQIA+ individual or former, what makes you qualified or disqualified to participate fully in the Pentecostal Church ministries as a volunteer or participating in a minor or major role in the ministry?

LGBTQIA+

(S) Code # 001LG - I think I am qualified because of my talents.

(S) Code # 002LG - Based On my experience, there are no qualifications and disqualifications. As long as you show your dedication and do what you can to serve the Lord and the Church then everything follows, they will give you the role you deserve.

(S) Code # 003LG - Things that makes me qualified is my potential and talents. The greatest factor that disqualifies me would be my sexual orientation.

6. What makes the LGBTQIA+ individual/ community qualified or disqualified to participate fully in the Pentecostal Church ministry as a volunteer or in any minor or major role?

PASTORS

(S) Code # 001P - In this area we are not God to judge people. For me, there are no reasons to qualify or disqualify someone who are willing to change.

(S) Code # 002P - Only God can qualify them if they are willing to be deliver from living in sin, because only those who are consecrated and set apart by God can be use for His Kingdom and glory.

(S) Code # 003P - What makes them qualified is when their life is transformed and what makes them disqualified to participate is when there is no transformation, because there is a tendency that they will abuse the given role.

(S) Code # 004P - Unwillingness to live a transformed life. They are disqualified because of unwillingness to follow and portray the life of Jesus as the only pattern for Christian living.

(S) Code # 005P - Willingly living in sin is ground for them to be disqualified.

(S) Code # 006P - They do not know themselves yet. How could they lead in a proper way if they themselves are confused.

(S) Code # 007P - Depends on their talents/ skills.

(I) Code # 008P - The disqualification of some LGBTQIA+, like gay, some of them dressed like woman and act like woman… For us to avoid criticism and persecution… especially there are still traditional inside the church… I encourage them not to dress like woman or wear make-ups. Although I talk to them with properly without offending them, giving them instructions than correcting them. What qualify them? Their talents and gifts is very helpful… and they can contribute more ideas.

(I) Code # 009P - One first major qualification for them is when they submit truly to the Lord, and what disqualifies them is the opposite, especially their acceptance to the Lord as their Lord and Savior.

(I) Code # 0010P - Actually, we have basis before pointing someone to a major ministry—and we can determine their level of faith. As we talked to them, we can identify their level of faith, knowing that they still have struggles in their feelings about themselves as LGBTQ, then we can tell they are not yet ready. That’s why we have discipleship that maybe along the way they will surrender and be lead from it—from the things they are facing. Until then when they surrender themselves—being equipped then we can consider them in a major ministry. In the minor works, they can participate and help, and everyone can. But in the major ministries, we should properly choose. In the Scripture, like choosing men to serve the food—like Stephen (Acts 6:1-6). They Apostle gave proper criteria to those who will be chosen—for just food concern, will only serve food but the criteria or the qualification is already strict. It is not only base on what they can do, yes, they are capable, skilled and talented— above all it is the faith in God we must most to consider.

6. What makes the LGBTQIA+ individual or community qualified or disqualified to participate fully in the Pentecostal Church ministry as a volunteer or in a minor or major role?

LEADERS/ LAYPEOPLE

(S) Code # 001LL - What will make them qualified either in minor or major roles is the depth of spiritual transformation that is manifested in all areas of their life… as observed.

(S) Code # 002LL - For me, they can join as long as they must abide in whatever the church regulation has. And they should strive to be change not remaining as who they are in the past.

(S) Code # 003LL - For me, they will be qualified soon if they would realize nakasalanan ang pagiging LGBTQIA and until they will be true to their gender.

(I) Code # 005LL - No answer

(I) Code # 006LL - If helping in a wedding a ministry still for me one basic example is Apostle’s Creed. There are many that disqualifies they, like a man cannot live like a woman. 1 Corinthians 6:9-10, this a sign, being confused of their gender or identity is already a sign they are not ready to get involve in the ministries, because we do not want to give the next generation to question the church. Why do they allow that person to get use when they have the same feeling like I do? So they are not to stand in front of people, but in other involvement, like washing dishes they can. As I say to the realm of getting involve with other people in a spiritual matter, they should not do it or to step up until the know what a man should be like and a woman should be like. Also, I think, just like the Philippines is not acknowledging that marriage between LGBTQIA+, I see it as a way to think that they are not legal to work inside the church—because they are not a good shepherd or example.

7. What can you do for the Pentecostal church as an LGBTQIA+ individual or the former if you can fully participate in the ministry like other members? (Follow-up question: What can the Pentecostal church do for you as an LGBTQIA+ or the former to fully participate in the ministries?)

LGBTQIA+

(S) Code # 001LG - Maybe an LGBT organization can also be established? Whose function will be to tackle LGBT related social issues such as HIV prevention, gender equality etc. and also to promote culture and the arts. Perhaps the LGBT GRP can be tasked to take charge of the church’s events, decors, performances etc.

(S) Code # 002LG - I or everyone can be an ambassador for the LGBTQIA+ It may be a way for me to encourage people that there are churches that do not look at what gender you have or the state of life you're living. For Churches, We greatly appreciate it if we could stop discrimination and look into the efforts of the people LGBTQIA+ who are willing to serve the church.

(S) Code # 003LG - As part of this community, always choose what is right and lets us be different. Avoid earthly bad doings

and in everything you do, do it to glorify God.

7. What can you do as a pastor for the LGBTQIA+ individuals and communities regarding their participation in the Pentecostal church ministries? Can they fully participate or not? Why? (Follow-up question: How and what will you teach the congregation about LGBTQIA+?)

PASTORS

(S) Code # 001P - They can. God will change them— God will transform them. They flock to know their Shepperd well. They need to understand that without love you can never teach someone.

(S) Code # 002P - As a pastor, it is our calling to continually reach out people and usher them into a personal relationship with God. Through Jesus Christ, we accept them who they are but if they want to continually walk in relationship with God and use by God they humble themselves and acknowledge healing from God. And if this happen God will open more doors of opportunity to participate in ministries and they will effectively use by God through their testimony to reach out those who are living in sin.

(S) Code # 003P - The participation of the LGBTQIA+ is supported if they go through the process if they wanted to be mentored, corrected, and if they allow God to transform their lives.

(S) Code # 004P - They are accepted as they are and give them a warm welcome, and give them a chance to live and experience a life that is free from any discrimination, treated them as leader and give them the ministry to use their talents and potentials for the Glory of God.

(S) Code # 005P - We welcome them in the church, but when it comes to ministry, there is a caution in allowing them to be involved. We see that they have a changed life and a fruit of their repentance is evident in their life.

-We will teach the congregation and love them and welcome the in the church.

(S) Code # 006P - Teach the church people that these kinds of people are still humans precious in the sight of God. Like any person coming to Christ, they must “be born again” and conform to the purpose God had made them to be. And becoming a Christian means you conform to the image of Christ (Romans 12:1-2)

(S) Code # 007P - Encourage them to participate in all activities that we are not the one who qualify a person, only God. Just welcome them in the church and let God change them into normal person.

(I) Code # 008P - The Bible is strict about this, yet we welcome them with the hope that they will be transformed according to the word of God. But I hope this will not take so long before we can see actual change in their life. As we allow them in the church, our goal is to keep sharing the word of God for them to be change, however, if there is no change in their life, maybe there are lacking in us as pastors. That’s why we spend time with them to help them be transformed. Like how I see the LGBTQIA+, I want the congregation and my children that they welcome them with love in the church without condemning and discriminating them.

(I) Code # 009P - Number one, pray for them. There are many things we can do for them… communicate with them, so them that they are acceptable—respecting them—and God will do the rest. In my family—I will be strict that hopefully no one will fall from their own feelings. I think we can appreciate people with the same gender, but not necessary mean you will change your own identity or gender. Teach them to accept what they have, teach them how they can fight those feelings. Many young people question their feelings, until they are influence by their surroundings but I still want them not to fall from their own feelings.

(I) Code # 010P - Before they enter the church, there are already awareness to them that the church will contradict them. But for me, it they do really desire to be transformed and as they risk to enter the church, I know the Holy Spirit will convict them. And as a pastor we should first stablished good relationship with them. Show and make them feel that they do belong in the church. But as they keep listening to the word of God, there will be struggles inside them, maybe personal conviction or realization that there will be a point that they will question a lot—and they will ask their pastor or leader about it. We need to always be ready and available for them and consistency. As I already talked about it in my previous preaching and teachings, like others we need to always be concerned— because we acknowledge that they are still part of the unbelieving community. There should always be an urgency that we need to reach out and to be concern for them, it doesn’t mean we need to go for what they are standing for—compromising them. We will not preach the Gospel without filtering just to please them, or to satisfy their ears, compromising your message for them, but is a no. Speak the gospel as it is, not necessary mean you look for what the good things. What we desire is for them to be delivered from it. We share the word of God and the Holy Spirit will to the rest to convict them.

7. What can you do as a leader (or a member) for LGBTQIA+ individuals and communities regarding their participation in the Pentecostal church ministries? Can they fully participate or not? Why? (How and what will you teach your children or the ministry you are involved with about LGBTQIA+?)

LEADERS/ LAYPEOPLE

(S) Code # 001LL - As a leader, I have to define in writing and explain fully the ground for participation of each member, not just identifying the LGBTQIA+, but to all, as general.

(S) Code # 002LL - As a member, we have to always stick on the bible is, and stick on it. Teach what is true and nothing but the truth.

(S) Code # 003LL - I will tell them in bible study or Sunday school time that God created 2 gender only na kasalanan ang LGBTQIA. Kaya nga naparusahan ang Sodom at Gomorra because of being a LGBTQIA. They can participate in church ministries but not in the major one.

(I) Code # 004LL - Keep encouraging them to join the church, and if they want to help in many areas of ministries they can still help. Keep welcoming them without moving away from them, at least I am a person that they can talk to. Still, keep encouraging them to join in every activity of the church while monitoring them. To the church, I want to teach them that they welcome them and keep loving them. Just like how Jesus love us—the sinners.

(I) Code # 005LL - Keep telling and sharing them the word of God, sending it to the prayer warrior. Not only pastor’s intervention, buttaT the same time we should have sessions about what is man or what is woman. Personally, when I see people like those, I talk to them in person and in private. Asking them first, how are they? What do they think are the things or feel that they have that other don’t have. It is a way for them to welcome themselves, and our ways to accept them that they can talk for themselves. Through it we can build the bridge to have conversation with them. And it is our way validate them through the word of God, it is not our own words of validation because we may end up hurting them, but validation using the word of God, to show them that God loves them, no matter what happens in the past or any spirit of confusion. And thank them for entering the church and appreciate. Still keep an eye on them, because in the point of their conversion, we can see that they are on

fire, but after some time, those feeling may return. Consistency is the key to help them.

-The bottom line, the Lord loves everyone. But still they belong to the classification that sin is living in them— they are living in sin. Just how God love us, that’s how we love others—that’s the ultimate rule for the life of every believer. Matthew 22:37-40.

How does the Pentecostal Church in (Baguio, La Trinidad, Itogon, Sablan, Tuba, Tublay) B.L.I.S.T.T receive and respond towards LGBTQIA+ participation in the church's ministries?

1. In your observation, what is/are the response(s) of the community and the churches towards the presence of LGBTQIA+?

PASTORS

P11 (I) Code #: 001PR- M: Idi 1980’s, people see them as not good, that’s why their parent will get angry with them, and seemingly this LGBTQIA+ are not acceptable in the society. Now, because of media, there seems to be changed in their perception and seemingly they accept LGBTQIA+ now. Before, many churches don’t see LGBTQIA+ as good, but now, they are acceptable in the church. However, being conservative, I still question their ways and thinking. Damagek isuda, apay agbakbakla ka ngay ket naggwapo ka met?

P12 (I) Code #: 002PR R: Before in our place when there was no church yet and people does not have deep knowledge of the Bible, if you act like a gay or lesbian expect that people will hate you. When your parent their children act like gay or lesbian they will surely smack you.

1. In your observation, what is/are the response(s) of the community and the churches towards the presence of LGBTQIA+?

LEADERS/ LAYPEOPLE

LL6 (S) Code #: 001LLR- In my observation, many don’t know how will they approach the LGBTQIA+, because in the eyes of many, what they are doing, way of speech and practice is wrong, that is not normal in setting them apart from the normal gender—male and female. Many avoid them and irritated, and many people don’t approach them so that they don’t end up judging them.

LL7 (I) Code #: 001LLR- They see them as they are, they have no choice to neglect their existence

(I) Code #: 008LLR- There are still hesitation of how they will accept them—they may not judge them with words but through body gestures of the people around them, we can see that they are not comfortable with the LGBTQIA+

(I) Code #: 009LLR- They tried understand them, it’s the LGBTQIA+ choice to be like that anyway.

2. In your church, do you have LGBTQIA+ members or none?

PASTORS

(I) Code #: 011PR M: We have, both gay and lesbian, and some of them grew in Sunday school.

(I) Code #: 012PR R: We don’t have

2. In your church, do you have LGBTQIA+ members or none?

LEADERS/ LAYPEOPLE

(S) Code #: 06LLR- Yes

(I) Code #: 07LLR- some visitors

(I) Code #: 08LLR- 1 before but we have no one anymore.

(I) Code #: 09LLR- 5 minors and 1 adult (some are students who only stayed for some times)

3. How do you receive or will receive an LGBTQIA+ in your congregation/ church as a pastor?

PASTORS

(I) Code #: 011PR M: But, for me as long as they have no relationship with same gender and their lifestyle is clean then it’s not a problem. As long nga they are not living in that kind of sin. So in our church, they are common… ken maibagak nga they are more talented and skilled and a big help, especially organizing events.

(I) Code #: 012PR R: We look as them as human they are not to be judge. Who am I to say that they are not welcome in the church? But the practice will be the defining/ distinguishing factors between. Sometimes there are people or men who is feminine in their acts and voice but it doesn’t mean they are gay. Sometime, I think because of the food we eat, some are chemically nourished, like growth hormones that is injected in some of the poultries today, these foods cause imbalance in human hormones too. I think we should not quick to judge people by the way they talk and act, but their practices. For we educate them with the way of the Lord, and change only possible when a person realized and acknowledged that Jesus is their Lord and Savior. I have no reason to reject them in the church, but if they have been doing what a gay does or a lesbian does, that’s a different story. Foremost, they are welcome in the church.

3. How do you receive or will receive an LGBTQIA+ in your congregation/ church as a leader or layperson?

LEADERS/ LAYPEOPLE

(S) Code #: 06LLR- Like how we receive all people who are sinners and in need of Christ.

(I) Code #: 07LLR- Through a process, keep sharing the word, while they keep hearing the word of God with personal Bible study, they themselves may realize that they are in the wrong position. We cannot change them after all, but I hope there will be time they will change personally.

(I) Code #: 08LLR- There are still process, and we have to accept them, and everyone entering the church are sinners. Accept them and let’s do our responsibility to educate them, pray for them and let the Holy Spirit work for them. We cannot change the, but the Holy Spirit can change them. Keep educating them with the Words of God, through it they will see, and by learning they will see God’s will.

(I) Code #: 09LLR- God’s love the sinners and we should do the same.

4. Can an LGBTQIA+ fully participate in the church ministries and activities? Explain?

PASTORS

(I) Code #: 011PR M: For me they can participate according to their purpose and talents. For example, there are some members of the church, who are LGBTQIA+, and when they see some projects and activities of the church, they give some money. For me, there are many ways to participate in the ministries and activities. For me as long as they are in the church, we give them opportunity to participate in many ways, not necessarily preaching or bible study. I also observed that one lesbian, but she knows how to play guitar, and in the small groups she plays the guitar, and that is already participation. There are a lot of ways to participate but they have to remember that they are not living in sins like having relationship with same sex partner. For me they are part of the grace of God. But if we see them that they practice that, then we talk to them, telling them that it is not good for a Christian to act like that. Our testimony matters as though not the lifestyle but are have to testify that we are a Christian and we do not live in sin.

(I) Code #: 012PR R: After teaching them, sharing them the word of God, administering to them and many more yet in the end there is no transformation in their lives, then they are not supposing to participate in any ministries. For me transformation and change is a progressive change of character and attitude that they are conforming to the purpose of God in their life. But there is a condition, that after all the loving, sharing and teaching of the instruction of the word of God and yet there is no change nor accept that they have to be transformed, that there is only man and woman.

4. Can an LGBTQIA+ fully participate in the church ministries and activities? Explain?

LEADERS/ LAYPEOPLE

(S) Code #: 06LLR- They can participate in the ministry if they are indeed transformed. We are not all worthy without the grace of God.

(I) Code #: 07LLR- If in the main ministry like they will be use in in front, not yet, and it is obvious that it should not be yet. Still they can help in the cleaning and church preparations. Still some church because of lack of manpower, they judge point out some LGBTQIA+ to do mainstream ministry or even stand in front of the church congregation. But I hope we avoid that.

(I) Code #: 08LLR- In participation and involvement, they can help with chairs, but not with the actual service, they can serve food and clean the church—and those are considered ministry. However, standing in front may not be for them yet. The church is not disregarding or judging them because they are not in front or part of the main services of the church. But I hope they will understand that whatever they do is important especially if it for the benefit of the church as a whole. So the smallest task and ministry is important. Giving them task will make them see that they to is important part of the church.

(I) Code #: 09LLR- They can participate, but in major parts like preaching and teaching, or leadership. There are some leaderships in a certain activities life head person of organizing an event or head chef, they are still talented in many areas. But we should avoid them in preaching and teaching parts.

5. According to the Bible or By-Laws and Rules and Regulations of your church, what makes an LGBTQIA+ unqualified or qualified in the church ministries?

PASTORS

(I) Code #: 011PR M: John 3:16, as long as they believe, who are we to say, “do not come here” They are welcome. As a body of Christ, we have to fit in, whatever talents or gifts they have by which they can function in the body of Christ. We cannot force a work on someone that they are not fit to do it. It is God who put us in the body, and gives us the function we can do in the Body. 1 Cor. 12. Some can function in anyway, hand, mouth, eyes. etc. Some of the family member of the gay asked me about it, for me, I told them that as long as they do not live in sins, then that’s not a problem for the church. Most of them are professionals, and they are very good in organizing activities. They are very helpful in the church as long as they function in the area they can contribute to. There is no specific whether we accept them or not, the point is they are part of the body, and as they continue doing parts in the body change also continuously happen in the process. Nothing is perfect, and not instantly we became perfect. There is one missionary says that, the way of speech (for gay-feminine) should also be change. The important is to live in their purpose and to live in holiness in the presence of the Lord. That is my point, not physically, but from the heart—they will be change—also their perspective. As part of the body of the church, they are too is a big asset in the church.

(I) Code #: 012PR R: In the beginning, God created man and woman, Gal 5, that’s the work of the flesh. 17 kinds of sins, that those who practice the sins will never inherit the kingdom of God. So the challenge here is for us to bring the gospel to these people, and that our only hope is when they believe in Christ the grace of God has its own way in transforming them. That’s why I said a while back, we should have continuous monitoring them— mentoring, for them to really overcome the situation they’re in. The reason they are doing that is because of the sin within their hearts, and our only hope is the blood of Christ that cleanses all unrighteousness. There is not restriction for them to be a part of the church, as long as they keep on serving the God, and doing what is righteous before the Lord—for us that is our qualification, and even for me—that’s my qualification. I may be pastor but if I am a liar—it disqualifies me. I can be talented as a person, and everyone has its own talents, and this actually is intended that as we polish these things is also part of participating and expansion of His Kingdom. If these people want to come to the Lord, why don’t we give them the chance to participate as long as they’re abiding to the ways and purpose in Christ. However, if they come to the church, and they keep living to their old sinful ways, having sexual relationship with same gender that is something we cannot afford to accept.

5. According to Biblical passages or By-Laws and Rules and Regulations of your church, what makes an LGBTQIA+ unqualified in the church ministries?

LEADERS/ LAYPEOPLE

(S) Code #: 06LLR- If the person has not yet changed, and if they have not yet accepted that there is only two gender that God created.

(I) Code #: 07LLR- If they will be use in front regardless, I think their leading will be dry. Do not be conformed to the pattern of the world. (Romans 12:2)

(I) Code #: 08LLR- I think not all people who claim they are LGBTQIA+ are dirty, some are clean—sexually means. I think as they know themselves, they personally know the restrictions of whether they want to be use in front or not. But I see some fighting with their feelings and want to live righteously. In the church, we accept sinners. Celibacy is a blessing like Paul. Being a single is a blessing.

(I) Code #: 09LLR- Sodom and Gomora: sexual immorality… I think the LGBTQIA+ may have they personal realization and conscience if they are sexually involved as they are or not. They will feel ashamed if they are sinning sexually, and those who are not may not be ashamed of such sin in them, because they are not doing it. So, we should not quick to judged them until we are aware of, they are really.

6. Whether an LGBTQIA+ is unqualified or qualified, what do you think is/are the ministry(ies) they can do or works they can actively help with?

PASTORS

(I) Code #: 011PR M: For me they can still participate in the 5-fold ministry as long as they are in the purpose— living in holiness and according to the will of God. There are people like them that are now preacher because God changed them—we don’t know. If that the case, we restrict them in the higher leadership we still discriminate. Although they should function according to their purpose, for me there people that were really have changed. There are many ways to participate and function. There is one church anniversary, the preacher was former LGBTQIA+, and they invited many other LGBTQIA+ to testify in front of people how they were also changed, although they may talked like feminine—but they are changed, and powerful wielder of the Word of God. We will not restrict them as long as God is the one who called them to that calling. Still, they should live according to their purpose, not according to the demand of a denomination… like these are the do’s and don’t’s. We do things according to our purpose. If the Lord calls them to be a pastor in order to witness to the people like them, why not, let them do it. However, we should keep monitoring their life as our part of the church—keep looking to their lifestyle.

(I) Code #: 012PR R: We know somebody, that their lifestyle and their involvement, and as they encounter the Gospel and as we open the church for them—they believe the word, they live the word, and that’s qualifies them. Living according to the Bible—and that’s what qualifies us all. This is the same, if you are a drunkard then it disqualifies you—so what is the different between drunkard and gay? Same sin. It is only by grace that we become part of the Kingdom of God—as long as we participate by grace that transform us to be a man really, and a real woman. It doesn’t matter how you talk or act—we may have raised up that way ended up them drawing away. What matter’s is nobody can contain the transformed life. They may be like that, but if they live in holiness and righteousness of Christ then that makes the gospel powerful in their lives. The evidence of the grace of God in

our lives is to be transformed. And as long as we see what they are doing and talking that is according to the will and ways of the Lord—then who we are to restrict them.

6. Whether an LGBTQIA+ is unqualified or qualified, what do you think is/are the ministry(ies) they can do or works they can actively help with?

LEADERS/ LAYPEOPLE

(S) Code #: 006LLR- If they really changed and accepted that there is only two gender that God created, then they can be a good example for those people that in the same situation as them. A model that will testify and give understanding to the same situation.

ALL7-9LLR-They can be in the backstage, preparation

7. How can you help LGBTQIA+ individuals and communities fully participate in the ministries and encourage them to participate actively in the church?

PASTORS

(I) Code #: 011PR M: Aside from discipleship, showing and modeling is also an example. Keep encouraging them as we make a good relationship with them. Having no deep relationship with them, these people will hesitate to tell their feelings and thoughts. We try to be friend and be closer with them—as a father or friend, so that they can open up their struggles. And everyone, every normal people have struggles of their own. We make our church available for them in time of their needs. We then become a big brother or a big sister for them. There are various struggles and circumstance which is true to everyone. My point is, be of help to them. Whatever the need, the church is there to help, and that is the function of the church. But, I hope they do not end up seeking or only remember the church or going to church when they have problems.

(I) Code #: 012PR R: In our church, we have this challenge also, we do need to do modeling and mentoring— leading them to the processes. Helping them understand concept and principles to live their lives accordingly. And of course, monitoring, building up relationship. Keep on updating their current status of faith or struggles. Asking them, “Where are you now?” They may response, “Pastor, I am currently here, struggling with these.” So in that way we can keep monitoring them. We acknowledge that in earlier conversion, there are struggles, it takes time to change that kind of lifestyle. The more they open up about their life, we can then help them.

7. How can you help LGBTQIA+ individuals and communities fully participate in the ministries and encourage them to participate actively in the church?

LEADERS/ LAYPEOPLE

(S) Code #: 006LLR- Start with ourselves—being a good example to people who are in the same service to God so that it will be easier to let them understand the duties we have for God.

(I) Code #: 007LLR-Personal counseling and bible study, with lg bt group or with other people.

(I) Code #: 008LLR- Bible study for the specified group, in that way they can help understand themselves.

(I) Code #: 009LLR- Sometime, we have to consider that not all the time, the LGBTQIA+ will do all the adjusting, we too must adjust. We do seminar for them and for all.

8. What are your recommendations for the other churches, pastors, leaders, and laypeople to help LGBTQIA+ to actively take part in the church?

LEADERS/ LAYPEOPLE

(S) Code #: 006LLR- Being a leader and servant of God, we have to be concern with those people that are confuse in their gender. We should be hypocrite telling them that they are in the wrong, rather help them understand the truth of the Bible. Help them, understand them, pray for them, and include them to the works that will help them truly understand their own gender and state in front of God.

(I) Code #: 008LLR- Awareness for all, inform people about LGBTQIA+
