# Supplementary material
Source: Research Square preprint supplement (doi:10.21203/rs.3.rs-9639507/v1)
Supplement: Supplementary file 2 [file d74dbc05ec352fdfa55f3fff.docx]

**Appendix A. Participant demographics and characteristics**

**Table 1**

*Participant Demographic Characteristics (N = 24)*

| **Participant Code** | **Gender** | **Age** | **City / Municipality** |
| --- | --- | --- | --- |
| P1 | Male | 45 | Tuba |
| P2 | Male | 41 | Baguio City |
| P3 | Female | 40 | Itogon |
| P4 | Female | 50 | Baguio City |
| P5 | Male | 57 | Sablan |
| P6 | Male | 54 | Tuba |
| P7 | Male | 52 | La Trinidad |
| P8 | Female | 47 | Sablan |
| P9 | Female | 32 | Tublay |
| P10 | Female | 27 | La Trinidad |
| P11 | Male | 53 | Baguio City |
| P12 | Male | 57 | Tublay |
| LL1 | Female | 43 | Itogon |
| LL2 | Female | 28 | La Trinidad |
| LL3 | Female | 28 | Itogon |
| LL4 | Female | 36 | La Trinidad |
| LL5 | Male | 25 | Sablan |
| LL6 | Male | 27 | Baguio City |
| LL7 | Female | 42 | La Trinidad |
| LL8 | Female | 31 | Itogon |
| LL9 | Female | 38 | Tuba |
| LG1 | Male (Former Gay) | 30 | Baguio City |
| LG2 | Pansexual | 27 | Baguio City |
| LG3 | Gay | 35 | Baguio City |

**Table 2**

*Participant Demographic Overview (N = 24)*

| **Participant Category** | **n** | **Age Range** | **Identity and Gender Profile** | **Geographic Distribution** |
| --- | --- | --- | --- | --- |
| Pastors | 12 | 27–57 | 7 Male, 5 Female | Baguio City (3), La Trinidad (2), Sablan (2), Tuba (2), Tublay (2), Itogon (1) |
| Church Leaders and Laypersons | 9 | 25–43 | 7 Female, 2 Male | Itogon (3), La Trinidad (3), Baguio City (1), Sablan (1), Tuba (1) |
| LGBTQIA+ Individuals | 3 | 27–35 | 1 Male (Former Gay), 1 Pansexual, 1 Gay | Baguio City (3) |

*Note.* BLISTT = Baguio City, La Trinidad, Itogon, Sablan, Tuba, and Tublay. Geographic distribution reflects individual participants, not congregations. Total congregations = 17.
